# Supplementary material for: CA1 pyramidal cell diversity is rooted in the time of neurogenesis
Source: eLife. 2021 Nov 1;10:e69270. doi: 10.7554/eLife.69270 (PMC8660020; doi:10.7554/eLife.69270)
Supplement: Figure 1—source data 1. [file elife-69270-fig1-data1.csv]

Dorsal CA1	Dorsal CA1	Dorsal CA1			Ventral CA1	Ventral CA1	Ventral CA1
E12.5	E14.5	E16.5			E12.5	E14.5	E16.5
91.1	0.0	8.0			53.8	78.9	16.1
0.0	17.0	12.0			132.4	86.4	12.6
64.8	29.0	10.0			84.7	73.3	19.6
85.0	19.0	11.0			206.0	127.3	0.0
49.0	22.0	-11.0			217.5	111.8	13.1
-80.7	58.0	0.0			96.8	118.0	12.9
83.4	0.0	20.0			151.2	49.5	3.5
53.8	29.0	21.0			106.1	85.0	11.1
25.6	18.0	0.0			49.4	61.9	20.3
69.2	22.0	-6.0			85.6	71.5	5.9
27.0	39.0	-6.0			209.3	83.6	19.0
38.0	26.0	0.0			125.0	62.6	8.8
0.0	50.0	0.0			140.3	42.3	5.9
24.0	14.0	0.0			-13.0	66.3	76.1
73.0	34.0	13.0			96.3	65.2	9.0
-100.0	0.0	13.0			48.4	91.6	11.1
43.0	31.0	0.0			177.8	64.4	7.9
59.0	19.0	9.0			210.6	86.0	20.6
0.0	38.0	18.0			5.1	43.3	21.3
0.0	12.0	13.0			16.7	61.9	7.6
30.0	42.0	14.0			44.1	48.6	5.9
16.2	20.0	7.0			223.6	66.4	-6.6
15.0	36.0	0.0			122.7	65.7	18.2
24.0	40.0	-10.0			168.3	36.1	7.1
19.4	8.0	12.0			89.8	69.7	91.1
79.0	34.0	23.0			119.6	54.5	32.1
29.0	29.0	3.0			179.9	48.7	-21.7
23.0	48.0	9.0			160.6	25.6	83.8
10.3	57.0	23.0			29.8	60.0	10.3
21.6	74.0	10.0			66.8	39.3	6.2
28.4	51.0	21.0			75.0	59.2	-16.5
26.6	36.0	20.0			43.6	15.9	37.0
17.0	33.0	25.0			144.7	61.0	15.2
118.0	44.0	-3.0			128.4	54.3	15.1
78.2	16.0	0.0			116.5	133.9	11.1
11.8	45.0	-8.0			26.2	92.3	15.2
80.0	27.0	16.0			76.2	206.4	63.0
96.0	28.0	17.0			88.0	56.0	18.4
71.0	31.0	22.0			88.3		32.2
64.0	33.0	0.0			48.2		27.4
41.7	52.0	0.0			179.8		14.0
11.8	31.0	0.0			25.1
51.7	30.0	22.0			23.8
34.9	38.0	18.0			170.6
92.0	15.0	0.0			350.3
9.0	39.0	0.0			28.3
13.0	18.0	12.0			17.4
0.0	44.0	17.0			27.8
78.0	45.0	0.0			40.8
39.0	36.0	19.0			94.7
58.0	26.0	19.0			54.9
51.0	30.0	9.0
16.0	19.0	13.0
134.0	40.0	-12.0
10.0	27.0	10.0
28.0	29.0	28.0
13.0	21.0	12.0
69.0	29.0	20.0
7.0	18.0	13.0
69.0	28.0	13.0
10.0	22.0	26.0
32.0	27.0	14.0
53.0	37.0	21.0
71.0	22.0	13.0
52.2	22.0	19.0
20.0	18.0	26.0
116.1	35.0	-8.0
148.4	41.0	-9.0
176.7	36.0	21.0
24.5	41.0	9.0
26.4	50.0	25.0
-7.1	27.0	9.0
-59.3	30.0	21.0
20.0	27.0	31.0
30.3	0.0	38.0
0.0	12.0	38.0
54.8	37.0	-18.0
101.9	11.0	26.0
29.7	14.0	41.0
24.5	48.0	16.0
38.7	22.0	17.0
49.7	22.0	35.0
62.6	45.0	0.0
87.1	44.0	0.0
60.6	24.0	12.0
38.7	14.0	13.0
78.0	35.0	27.0
148.4	48.0	19.0
69.7	27.0	0.0
55.5	43.0	-12.0
6.5	15.0	25.0
62.6	37.0	26.0
161.3	56.0	31.0
69.7	25.0	14.0
61.9	28.0	22.0
61.3	28.0	35.0
65.8	45.0	12.0
93.5	28.0	22.0
81.9	50.0	26.0
0.0	10.0	28.0
12.3	35.0	41.0
18.1	34.0	28.0
176.7	16.0	20.0
54.2	40.0	37.0
120.0	43.0	13.0
81.3	45.0	-14.0
63.2	14.0	0.0
74.2	44.0	51.0
94.2	37.0	40.0
127.7	44.0	11.0
27.1	9.0	28.0
36.8	35.0	9.0
118.0	39.0	28.0
123.8	38.0	29.0
0.0	35.0	0.0
19.4	30.0	14.0
72.9	34.0	5.0
0.0	27.0	33.0
69.7	25.0	0.0
59.3	26.0	18.0
174.8	24.0	32.0
149.0	27.0	-15.0
45.2	17.0	0.0
10.3	18.0	27.0
54.2	29.0	27.0
41.3	9.0	0.0
61.3	56.0	41.0
189.6	0.0	-20.0
65.8	41.0	-15.0
223.8	0.0	0.0
0.0	29.0	-10.0
64.5	0.0	22.0
104.5	39.0	30.0
90.9	36.0	19.0
53.5	23.0	25.0
45.2	14.0	36.0
42.6	30.0	60.0
72.2	11.0	23.0
50.3	37.0	50.0
76.8	8.0	50.0
94.2	41.0	0.0
109.7	68.0	12.0
-16.8	57.0	8.0
83.9	12.0	21.0
102.6	30.0	32.0
72.2	23.0	30.0
85.1	28.0	30.0
80.6	26.0	45.0
176.7	0.0	0.0
91.6	22.0	0.0
105.1	18.0	18.0
67.7	46.0	40.0
21.9	0.0	-9.0
25.2	43.0	18.0
99.3	0.0	30.0
0.0	27.0	21.0
-58.7	43.0	41.0
125.8	0.0	41.0
29.0	49.0	0.0
97.4	38.0	0.0
19.4	0.0	0.0
82.6	19.0	0.0
103.2	51.0	8.0
49.0	12.0	11.0
74.2	22.0	5.0
51.0	39.0	0.0
56.1	39.0	-11.0
204.5	58.0	9.0
89.0	60.0	20.0
43.2	60.0	0.0
74.2	32.0	0.0
31.0	56.0	0.0
46.4	63.0	9.0
99.3	53.0	9.0
81.3	11.0	22.0
34.2	47.0	0.0
16.8	47.0	13.0
136.7	35.0	9.0
186.4	15.0	11.0
125.8	30.0	11.0
121.9	19.0	14.0
114.2	40.0	23.0
116.7	20.0	13.0
191.6	42.0	12.0
122.6	22.0	5.0
111.6	50.0	0.0
79.3	10.0	13.0
111.6	17.0	6.0
108.4	45.0	7.0
98.0	22.0	16.0
114.2	53.0	17.0
134.2	0.0	24.0
116.1	25.0	12.0
113.5	59.0	12.0
83.9	48.0	5.0
127.7	17.0	0.0
132.9	30.0	0.0
105.8	29.0	0.0
107.7	9.0	0.0
120.6	32.0	0.0
77.4	21.0	0.0
136.1	35.0	13.0
178.0	14.0	22.0
172.9	22.0	9.0
361.2	50.0	19.0
173.5	32.0	0.0
87.7	32.0	0.0
163.8	14.0	0.0
136.1	25.0	13.0
47.1	42.0	14.0
65.0	0.0	9.0
11.0	23.0	9.0
32.0	46.0	7.0
0.0	21.0	12.0
28.0	28.0	0.0
0.0	39.0	16.0
74.0	25.0	0.0
49.0	37.0	0.0
78.0	37.0	0.0
18.0	24.0	-5.0
47.0	46.0	25.0
49.0	29.0	18.0
69.0	43.0	8.0
31.0	31.0	15.0
11.0	28.0	0.0
19.0	47.0	0.0
27.0	9.0	37.0
6.0	15.0	0.0
26.0	13.0	10.0
24.0	15.0	9.0
32.0	46.0	10.0
42.0	37.0	10.0
23.0	40.0	0.0
15.0	31.0	-10.0
48.0	47.0	-10.0
26.0	35.0	22.0
45.0	26.0	12.0
68.0	28.0	16.0
78.0	17.0	10.0
61.0	44.0	3.0
41.0	31.0	0.0
50.0	38.0	23.0
69.0	9.0	11.0
56.0	41.0	10.0
66.0	32.0	14.0
83.0	24.0	11.0
85.0	20.0	12.0
71.0	40.0	11.0
64.0	33.0	6.0
59.0	27.0	14.0
88.0	45.0	22.0
46.0	27.0	6.0
93.0	27.0	10.0
70.0	38.0	27.0
64.0	36.0	10.0
71.0	38.0	22.0
70.0	21.0	33.0
54.0	22.0	33.0
36.0	48.0	22.0
57.0	33.0	15.0
42.0	50.0	5.0
73.0	34.0	15.0
100.0	33.0	15.0
	37.0	0.0
	26.0	13.0
	19.0	16.0
	39.0	30.0
	38.0	8.0
	39.0	8.0
	11.0	11.0
	29.0	11.0
	39.0	7.0
	21.0	24.0
	47.0	17.0
	32.0	-10.0
	51.0	30.0
	19.0	6.0
	10.0	16.0
	42.0	-9.0
	32.0	21.0
	50.0	17.0
	22.0	34.0
	42.0	12.0
	31.0	32.0
	48.0	12.0
	35.0	23.0
	34.0	0.0
	20.0
	49.0
	41.0
	51.0
	0.0
	22.0
	14.0
	29.0
	56.0
	16.0
	39.0
	52.0
	78.0
	33.0
	76.0
	25.0
	48.0
	50.0
	45.0
	27.0
	11.0
	44.0
	32.0
	42.0
	61.0
	23.0
	47.0
	46.0
	49.0
	21.0
	32.0
	53.0
	43.0
	43.0
	61.0
	85.0
	63.0
	46.0
	36.0
	61.0
	72.0
	17.0
	9.0
	65.0
	17.0
	38.0
	38.0
	62.0
	59.0
	30.0
	56.0
	50.0
	10.0
	34.0
	47.0
	17.0
	48.0
	55.0
	16.0
	28.0
	47.0
	11.0
	58.0
	29.0
	67.0
	49.0
	71.0
	61.0
	0.0
	44.0
	23.0
	37.0
	56.0
	59.0
	17.0
	40.0
	60.0
	28.0
	13.0
	68.0
	35.0
	58.0
	21.0
	62.0
	41.0
	17.0
	67.0
	45.0
	37.0
	38.0
	60.0
	44.0
	11.0
	53.0
	37.0
	22.0
	27.0
	43.0
	21.0
	39.0
	50.0
	39.0
	38.0
	15.0
	0.0
	30.0
	52.0
	35.0
	29.0
	26.0
	31.0
	35.0
	31.0
	42.0
	64.0
	34.0
	38.0
	18.0
	40.0
	13.0
	38.0
	53.0
	23.0
	22.0
	47.0
	30.0
	50.0
	15.0
	0.0
	35.0
	43.0
	58.0
	46.0
	50.0
	36.0
	49.0
	12.0
	31.0
	62.0
	51.0
	22.0
	51.0
	36.0
	57.0
	52.0
	49.0
	56.0
	34.0
	34.0
	45.0
	0.0
	0.0
	44.0
	49.0
	0.0
	50.0
	33.0
	59.0
	27.0
	34.0
	51.0
	34.0
	56.0
	56.0
	0.0
	25.0
	38.0
	55.0
	9.0
	28.0
	47.0
	58.0
	33.0
	33.0
	53.0
	9.0
	28.0
	24.0
	42.0
	30.0
	47.0
	31.0
	36.0
	55.0
	22.0
	23.0
	36.0
	23.0
	17.0
	18.0
	7.0
	33.0
	33.0
	8.0
	25.0
	42.0
	36.0
	41.0
	33.0
	43.0
	42.0
	42.0
	19.0
	31.0
	16.0
	41.0
	13.0
	31.0
	30.0
	30.0
	31.0
	32.0
	34.0
	14.0
	32.0
	34.0
	49.0
	8.0
	26.0
	39.0
	38.0
	22.0
	38.0
	43.0
	35.0
	26.0
	10.0
	16.0
	34.0
	15.0
	26.0
	15.0
	43.0
	63.0
	12.0
	16.0
	43.0
	55.0
	35.0
	0.0
	0.0
	0.0
	30.0
	19.0
	17.0
	21.0
	26.0
	10.0
	19.0
	25.0
	31.0
	31.0
	42.0
	16.0
	54.0
	40.0
	38.0
	42.0
	42.0
	42.0
	42.0
	29.0
	37.0
	35.0
	12.0
	36.0
	11.0
	28.0
	44.0
	44.0
	20.0
	30.0
	19.0
	23.0
	33.0
	49.0
	48.0
	30.0
	22.0
	33.0
	40.0
	52.0
	34.0
	44.0
	53.0
	26.0
	43.0
	31.0
	5.0
	40.0
	51.0
	34.0
	30.0
	47.0
	35.0
	35.0
	49.0
	31.0
	31.0
	80.0
	17.0
	50.0
	70.0
	50.0
	35.0
	39.0
	31.0
	61.0
	72.0
	78.0
	39.0
	45.0
	45.0
	45.0
	32.0
	15.0
	40.0
	50.0
	56.0
	42.0
	37.0
	31.0
	53.0
	63.0
	30.0
	56.0
	80.0
	70.0
	0.0
	63.0
	38.0
	60.0
	47.0
	21.0
	21.0
	21.0
	28.0
	67.0
	37.0
	31.0
	14.0
	28.0
	41.0
	50.0
	39.0
	18.0
	25.0
	13.0
	42.0
	36.0
	36.0
	44.0
	18.0
	44.0
	-31.0
	43.0
	44.0
	48.0
	27.0
	78.0
	74.0
	23.0
	37.0
	60.0
	45.0
	10.0
	16.0
	51.0
	67.0
	43.0
	44.0
	48.0
	27.0
	78.0
	74.0
	23.0
	37.0
	60.0
	45.0
	10.0
	16.0
	56.0
	67.0
	39.0
	32.0
	20.0
	34.0
	45.0
	7.0
	41.0
	47.0
	38.0
	63.0
	49.0
	55.0
	28.0
	26.0
	23.0
	0.0
	15.0
	27.0
	40.0
	50.0
	50.0
	47.0
	-18.0
	50.0
	0.0
	60.0
	84.0
	103.0
	66.0
	66.0
	47.0
	0.0
	82.0
	105.0
	105.0
	50.0
	50.0
	11.0
	40.0
	57.0
	29.0
	38.0
	41.0
	38.0
	26.0
	21.0
	20.0
	40.0
	50.0
	21.0
	15.0
	40.0
	10.0
	55.0
	28.0
	75.0
	38.0
	51.0
	23.0
	23.0
	16.0
	46.0
	38.0
	24.0
	46.0
	17.0
	14.0
	29.0
	41.0
	12.0
	24.0
	37.0
	23.0
	37.0
	22.0
	39.0
	43.0
	33.0
	47.0
	30.0
	33.0
	23.0
	22.0
	34.0
	37.0
	42.0
	20.0
	36.0
	49.0
	39.0
	33.0
	21.0
	21.0
	40.0
	36.0
	45.0
	51.0
	21.0
	57.0
	26.0
	34.0
	40.0
	89.0
	19.0
	39.0
	56.0
	36.0
	0.0
	56.0
	13.0
	52.0
	49.0
	13.0
	36.0
	26.0
	54.0
	85.0
	54.0
	13.0
	44.0
	28.0
	49.0
	23.0
	0.0
	41.0
	41.0
	43.0
	87.0
	51.0
	55.0
	65.0
	42.0
	21.0
	44.0
	9.0
	21.0
	38.0
	30.0
	38.0
	26.0
	41.0
	41.0
	44.0
	30.0
	54.0
	66.0
	47.0
	41.0
	21.0
	24.0
	24.0
	14.0
	37.0
	65.0
	36.0
	24.0
	34.0
	34.0
	25.0
	48.0
