# Supplementary material for: CA1 pyramidal cell diversity is rooted in the time of neurogenesis
Source: eLife. 2021 Nov 1;10:e69270. doi: 10.7554/eLife.69270 (PMC8660020; doi:10.7554/eLife.69270)
Supplement: Figure 1—source data 2. [file elife-69270-fig1-data2.csv]

	E12.5	E14.5	E16.5
#1	175,00	10333,00	3446,00
#2	1155,00	6670,00	4038,00
#3	2018,00	3428,00	3273,00
#4	320,00
mean	917,00	6810,00	3586,00
SD	851,00	3454,00	4001,00
