# Supplementary material for: CA1 pyramidal cell diversity is rooted in the time of neurogenesis
Source: eLife. 2021 Nov 1;10:e69270. doi: 10.7554/eLife.69270 (PMC8660020; doi:10.7554/eLife.69270)
Supplement: Figure 4—source data 1. [file elife-69270-fig4-data1.csv]

/ = data not available
				evoked IPSCs						evoked IPSCs		evoked EPSCs						evoked EPSCs
rec	mouse ID	cell ID	Location (0-1)	Amplitude (pA)	Area (pA*ms)	Rise (ms)	Decay (ms)	HW (ms)	Tau	PPR		Amplitude (pA)	Area (pA*ms)	Rise (ms)	Decay (ms)	HW (ms)	Tau	PPR
2017_08_04_00	mE12_1	vE12_01	-0.1413	727.2795	25845.0491	3.65	22.3	26.4	27.9347	0.94927		248.2536	4523.1244	2.75	12.55	14.15	15.1311	1.8561
2017_08_11_00	mE12_2	vE12_02	0.8672	1870.8778	62313.0743	4.45	24.4	25.3	29.0668	0.71704		381.4433	7101.8036	2.75	14.15	15.05	15.5995	1.03
2017_10_18_02	mE12_3	vE12_03	0.8539	587.22	9490.5	2.75	11.3	13.2	13.5696	1.0886		422.8547	3839.5938	2.1	5.35	7.5	6.3	1.5468
2017_12_13_00	mE12_4	vE12_04	0.7489	1951.8381	71806.0498	4.35	27.05	27.15	31.8483	0.63548		265.2647	5032.3657	3	10.75	14.8	13.3646	1.4706
2017_12_13_01	mE12_4	vE12_05	-0.4583	682.9116	44370.5704	7.6	56.2	45.1	68.2051	0.63269		107.547	6435.9949	1.3	50.45	41.15	58.1522	1.068
2017_12_13_02	mE12_4	vE12_06	0.2708	672.6965	33203.4568	5.7	32.7	37.7	40.6387	0.78464		721.9562	8286.1804	2.05	7.75	10.1	8.4413	/
2019_02_26_00	mE12_5	vE12_07	0.3297	237.1254	8752.9115	3.3	34.85	19.65	50.9921	1.6056		121.0431	2736.0046	3.05	19.1	19.25	17.3417	1.0365
2019_02_26_01	mE12_5	vE12_08	0.2173	527.0451	21107.0853	7.1	31.2	30.4	36.1398	0.75351		197.8854	3746.0391	2.45	15.5	16.6	13.4739	1.2
2019_02_27_00	mE12_6	vE12_09	0.2792	1125.243	29729.112	1.8	19.85	20.3	24.1091	0.83108		500.7951	7272.484	3.5	9.95	12.5	11.0528	1.4805
2019_02_27_01	mE12_6	vE12_10	0.4653	763.6722	13586.8426	3.2	15	11.65	16.8123	0.69197		189.21	2439.1511	2.8	8.35	9	11.0186	0.93151
2019_02_27_02	mE12_6	vE12_11	0.9491	1315.0447	37576.5266	2.5	22	21.35	27.3811	/		458.2015	13171.0897	3.2	14.65	18.75	17.3969	0.96525
2019_02_27_03	mE12_6	vE12_12	0.5535	889.7179	25934.0182	2.05	23.35	23.9	25.609	0.76088		330.9026	5150.7465	2.6	11.45	12.2	13.4895	1.1323
2017_07_19_03	mE14_1	vE14_01	0.3878	544.0677	20483.4992	5.7	29.05	27.55	36.8781	0.48346		566.2439	6689.1952	2.55	6.7	10.15	7.5309	0.99331
2017_07_25_00	mE14_2	vE14_02	0.8495	1793.4279	51495.3744	4.15	19.55	21.3	22.7649	0.73287		315.2922	5853.9897	4.4	8.65	12.75	12.08	/
2017_07_25_01	mE14_2	vE14_03	0.6904	542.4431	18513.975	2.85	25.6	27.05	30.5373	0.58114		468.9017	5387.9893	2.15	6.75	8.85	8.4863	1.3119
2017_07_25_03	mE14_2	vE14_04	0.7457	739.5451	20405.713	4	20.85	19.25	24.9621	0.72446		163.4676	2064.6873	1.6	7.8	10	9.5086	1.37
2017_08_22_00	mE14_3	vE14_05	0.8023	1083.7906	25298.1542	0.9	19.25	16.95	22.8563	0.63885		267.5852	2532.4001	1.4	6.4	7.55	7.5265	1.05344521
2018_10_24_00	mE14_4	vE14_06	0.6556	548.1337439	30875.67324	6.45	43.8	45.95	51.04159349	0.531546922		121.6838762	2800.731347	2.8	18.9	18	20.91035801	1.640232771
2018_10_24_01	mE14_4	vE14_07	0.4031	800.4901	79056.0897	8.75	90.75	90.6	92.5364	0.1414		516.1845	20052.0897	3.8	24.4	26.45	43.7624	0.80983
2018_10_24_03	mE14_4	vE14_08	0.2974	825.1682	52354.3933	8.2	52	60.9872	49.2	/		275.721776	7700.842412	2.95	15.55	18.05	21.5066	1.4837
2018_10_25_01	mE14_5	vE14_09	0.5409	1099.7242	61133.5783	4.8	50.7	39.95	57.6732	0.45078		450.1638	17137.4067	3.65	18.05	20.15	27.22381731	1.1041
2018_10_25_02	mE14_5	vE14_10	/	978.5435	49159.7079	2.55	36.2	37.75	46.003	0.70029		363.6639	8230.1367	3.15	14.45	14.55	23.0955	1.145
2018_10_26_00	mE14_6	vE14_11	0.1979	666.61	25344.7541	2.55	29.2	26.1	36.1721	0.8161		311.494	4332.4	2.55	8.45	10.15	10.1475	1.4221
2018_10_26_01	mE14_6	vE14_12	0.651	722.407	45469	9.5	57.1	55.25	67.6334	0.494753111		488.6101	7797.3	2.4	9.75	9.55	12.113	1.0974
2018_10_26_02	mE14_6	vE14_13	0.4517	489.5354	20382	7.6	25.65	29.6	36.1768	/		59.1961	1386.5	3.5	13.45	17.45	17.3121	/
2018_11_14_00	mE14_7	vE14_14	0.7809	1845.8	56100	2.35	23.55	19.8	28.2012	0.673631583		264.4253	3684.3	2.75	8.5	10.35	9.904	1.5352
2018_11_14_01	mE14_7	vE14_15	1.1916	1695.7865	31335.6433	2.8	15.8	14.4	18.02	0.8225		596.1022	7718.9	2.7	10	12.15	10.1534	1.1491
2017_11_20_03	mE16_1	vE16_01	/	/	/	/	/	/	/	/		46.0867	1233.8063	1.3	6.8	13.7	8.4524	1.258
2017_12_18_0001	mE16_2	vE16_02	0.2346	694.9673	20444.7311	4	20.9	22	26.8309	1.3967		173.0236	1496.0121	2.9	5.95	6.4	7.7203	1.5103
2017_12_20_02	mE16_3	vE16_03	0.1298	315.0469	12317.4452	3.7	24.2	29.4	30.2457	0.48192		139.4339	1488.4895	3.6	9.05	6.15	14.5627	1.2056
2019_01_17_00	mE16_4	vE16_04	0.307	1400.361552	45341.48175	2.05	21.75	21.25	25.98000702	0.67114		370.6059942	5275.72132	2.55	10.6	11.65	12.11979782	1.1592
2019_01_17_01	mE16_4	vE16_05	0.1421	1732.942	64176.3504	4.7	26.1	29.05	31.3608	0.51199		658.0163	12803.1692	3.35	14.4	15.7	17.3895	1.0822
2019_01_17_02	mE16_4	vE16_06	0.1442	661.4635	28293.0762	2.7	40.3	30.1	45.4002	/		279.2697	4718.8319	5.3	11.95	13.9	13.8322	1.0543
2019_02_07_00	mE16_5	vE16_07	0.0865	1046.9892	97803.8577	7.35	79.05	80.05	86.3084	0.1699		1121.493575	22706.53005	3.5	13.75	13.95	16.45594647	0.85199
2019_02_19_00	mE16_6	vE16_08	0.1889	1074.9846	49105.4957	3.55	34.05	32.8	40.0759	0.61939		439.1695	8741.7343	2.75	12.45	13.4	16.3347	1.2107
2019_02_19_01	mE16_6	vE16_09	0.5803	945.5528	31015.5298	4.25	26.95	24.2	30.6145	0.82176		452.1632	6738.4762	3.45	10.15	12.4	11.7841	1.1222
2019_02_19_03	mE16_6	vE16_10	0.1623	1511.8116	79894.3113	2.8	41.55	42.55	50.5614	0.54679		494.4472	12082.8848	4.3	16.9	19.6	18.6604	0.93187
2019_02_20_00	mE16_7	vE16_11	0.4103	2173.3795	213076.0199	4.3	90.7	85.55	98.7992	0.23508		1142.1061	27439.2549	2.25	14.7	12.1	21.4691	1.1328
2019_02_20_01	mE16_7	vE16_12	0.3236	1126.9776	59166.118	3.15	46.95	42.8	57.2167	0.49284		428.2785	8949.6952	2.55	13.3	14	16.9912	1.2299
2019_02_20_02	mE16_7	vE16_13	0.1522	1169.9548	40030.4468	1.8	25.65	22.6	31.8308	0.4418		248.5918	4032.3978	2.55	9.5	12.1	12.1791	1.0407
