# Supplementary material for: CA1 pyramidal cell diversity is rooted in the time of neurogenesis
Source: eLife. 2021 Nov 1;10:e69270. doi: 10.7554/eLife.69270 (PMC8660020; doi:10.7554/eLife.69270)
Supplement: Figure 4—source data 2. [file elife-69270-fig4-data2.csv]

SPONTANEOUS IPSCs
	Frequency	Amplitude	Area	Rise	Tau
Best-fit values
Slope	15.12	6.507	216.7	0.1713	-4.417
Y-intercept	23.34	27.71	363.9	0.7391	15.97
X-intercept	-1.544	-4.259	-1.679	-4.314	3.616
1/slope	0.06615	0.1537	0.004615	5.837	-0.2264
Std. Error
Slope	9.187	6.426	131	0.2063	2.453
Y-intercept	5.192	3.48	70.92	0.1166	1.386
95% Confidence Intervals
Slope	-3.596 to 33.83	-6.617 to 19.63	-50.75 to 484.1	-0.2489 to 0.5916	-9.413 to 0.5789
Y-intercept	12.76 to 33.91	20.61 to 34.82	219.0 to 508.7	0.5016 to 0.9766	13.15 to 18.80
X-intercept	-infinity to -0.3939	-infinity to -1.082	-infinity to -0.4711	-infinity to -0.8796	1.945 to +infinity
Goodness of Fit
R squared	0.07802	0.03304	0.08364	0.02109	0.09202
Sy.x	14.82	9.784	199.4	0.3328	3.956
Is slope significantly non-zero?
F	2.708	1.025	2.738	0.6895	3.243
DFn, DFd	1, 32	1, 30	1, 30	1, 32	1, 32
P value	0.1096	0.3194	0.1084	0.4125	0.0812
Deviation from zero?	Not Significant	Not Significant	Not Significant	Not Significant	Not Significant
SPONTANEOUS EPSCs
	Frequency	Amplitude	Area	Rise	Tau
Best-fit values
Slope	6.753	0.2419	15.83	-0.152	1.236
Y-intercept	5.06	14.72	108.7	1.097	5.272
X-intercept	-0.7493	-60.84	-6.87	7.212	-4.267
1/slope	0.1481	4.134	0.06319	-6.577	0.8093
Std. Error
Slope	2.609	2.211	33.27	0.2698	0.7812
Y-intercept	1.456	1.206	18.14	0.1536	0.4557
95% Confidence Intervals
Slope	1.424 to 12.08	-4.280 to 4.764	-52.22 to 83.87	-0.7023 to 0.3982	-0.3621 to 2.833
Y-intercept	2.086 to 8.033	12.25 to 17.18	71.61 to 145.8	0.7833 to 1.410	4.340 to 6.204
X-intercept	-5.390 to -0.1808	-infinity to -2.630	-infinity to -0.8913	1.928 to +infinity	-infinity to -1.562
Goodness of Fit
R squared	0.1825	0.0004126	0.007741	0.01014	0.07941
Sy.x	4.095	3.364	50.61	0.4346	1.226
Is slope significantly non-zero?
F	6.698	0.01197	0.2262	0.3176	2.502
DFn, DFd	1, 30	1, 29	1, 29	1, 31	1, 29
P value	0.0147	0.9136	0.6379	0.5771	0.1246
Deviation from zero?	Significant	Not Significant	Not Significant	Not Significant	Not Significant
	E-I ratio
	Frequency	Amplitude
Best-fit values
Slope	0.199	0.0323
Y-intercept	0.2012	0.5148
X-intercept	-1.011	-15.94
1/slope	5.025	30.96
Std. Error
Slope	0.08375	0.1073
Y-intercept	0.04742	0.05735
95% Confidence Intervals
Slope	0.02772 to 0.3703	-0.1874 to 0.2520
Y-intercept	0.1042 to 0.2982	0.3973 to 0.6323
X-intercept	-10.31 to -0.2935	-infinity to -1.625
Goodness of Fit
R squared	0.163	0.003226
Sy.x	0.1317	0.1592
Is slope significantly non-zero?
F	5.646	0.09063
DFn, DFd	1, 29	1, 28
P value	0.0243	0.7656
Deviation from zero?	Significant	Not Significant
EVOKED IPSCs
	Amplitude	Area	Rise	Decay	Tau
Best-fit values
Slope	626.9	-4174	-0.2606	-18.96	-19.05
Y-intercept	674.9	41787	4.435	40.29	48.03
X-intercept	-1.077	10.01	17.02	2.125	2.522
1/slope	0.001595	-0.0002396	-3.838	-0.05274	-0.0525
Std. Error
Slope	272.9	14118	1.357	8.302	10.98
Y-intercept	155.3	8036	0.7725	4.701	6.249
95% Confidence Intervals
Slope	70.25 to 1183	-32968 to 24620	-3.029 to 2.507	-35.92 to -2.007	-41.44 to 3.344
Y-intercept	358.1 to 991.7	25397 to 58176	2.860 to 6.011	30.69 to 49.89	35.28 to 60.77
X-intercept	-13.55 to -0.3151	1.671 to +infinity	1.892 to +infinity	1.331 to 15.96	1.404 to +infinity
Goodness of Fit
R squared	0.1454	0.002812	0.001188	0.1481	0.0885
Sy.x	439.6	22743	2.186	13.31	17.69
Is slope significantly non-zero?
F	5.276	0.08742	0.03686	5.217	3.01
DFn, DFd	1, 31	1, 31	1, 31	1, 30	1, 31
P value	0.0285	0.7695	0.849	0.0296	0.0927
Deviation from zero?	Significant	Not Significant	Not Significant	Significant	Not Significant
EVOKED EPSCs
	Amplitude	Area	Rise	Decay	Tau
Best-fit values
Slope	-86.31	-309.3	-0.7764	-2.945	-3.481
Y-intercept	440.9	6628	3.305	13.15	15.41
X-intercept	5.108	21.43	4.257	4.463	4.426
1/slope	-0.01159	-0.003233	-1.288	-0.3395	-0.2872
Std. Error
Slope	144.2	2717	0.4483	2.559	2.809
Y-intercept	79.36	1526	0.2467	1.408	1.556
95% Confidence Intervals
Slope	-379.4 to 206.8	-5844 to 5225	-1.687 to 0.1345	-8.145 to 2.255	-9.197 to 2.234
Y-intercept	279.6 to 602.2	3520 to 9737	2.804 to 3.806	10.28 to 16.01	12.24 to 18.57
X-intercept	1.499 to +infinity	1.561 to +infinity	2.202 to +infinity	1.899 to +infinity	1.954 to +infinity
Goodness of Fit
R squared	0.01042	0.0004048	0.08109	0.03751	0.04447
Sy.x	242.7	4443	0.7545	4.307	4.724
Is slope significantly non-zero?
F	0.3582	0.01296	3	1.325	1.536
DFn, DFd	1, 34	1, 32	1, 34	1, 34	1, 33
P value	0.5535	0.9101	0.0923	0.2577	0.224
Deviation from zero?	Not Significant	Not Significant	Not Significant	Not Significant	Not Significant
