# Supplementary material for: CA1 pyramidal cell diversity is rooted in the time of neurogenesis
Source: eLife. 2021 Nov 1;10:e69270. doi: 10.7554/eLife.69270 (PMC8660020; doi:10.7554/eLife.69270)
Supplement: Figure 5—source data 1. [file elife-69270-fig5-data1.csv]

exp ID	Birthdate	Target	Tdt+ (cell count)	Ctb+/Tdt+ (cell count)	Fraction
CL019	E12.5	mPFC	35	7	0.2
CL020	E12.5	mPFC	162	42	0.2593
CL017	E14.5	mPFC	132	32	0.2424
CL023	E14.5	mPFC	445	47	0.1056
CL024	E14.5	mPFC	291	35	0.1203
CL025	E14.5	mPFC	277	12	0.0433
CL026	E14.5	mPFC	277	41	0.148
CL027	E16.5	mPFC	277	41	0.148
CL028	E16.5	mPFC	150	8	0.0533
CL030	E16.5	mPFC	153	4	0.0261
CL031	E16.5	mPFC	82	2	0.0244
CL064	E12.5	LS	158	15	0.0949
AI38	E12.5	LS	43	13	0.3023
AI25	E12.5	LS	86	32	0.3721
CL043	E14.5	LS	71	8	0.1127
CL044	E14.5	LS	119	17	0.1429
CL045	E14.5	LS	177	35	0.1977
CL054	E14.5	LS	203	10	0.0493
AI39	E14.5	LS	103	19	0.1845
AI50	E14.5	LS	54	10	0.1852
CL055	E16.5	LS	67	12	0.1791
CL056	E16.5	LS	62	7	0.1129
AI40	E16.5	LS	89	24	0.2697
AI51	E16.5	LS	55	13	0.2364
CL040	E12.5	Amy	59	2	0.0339
CL065	E12.5	Amy	127	23	0.1811
CL066	E12.5	Amy	215	30	0.1395
CL036	E14.5	Amy	124	11	0.0887
CL037	E14.5	Amy	244	7	0.0287
CL038	E14.5	Amy	218	18	0.0826
CL039	E14.5	Amy	149	22	0.1477
CL059	E16.5	Amy	58	2	0.0345
CL060	E16.5	Amy	49	3	0.0612
CL061	E16.5	Amy	101	1	0.0099
CL067	E16.5	Amy	80	0	0
AI44	E12.5	NAcc	50	5	0.1
AI22	E12.5	NAcc	108	29	0.2685
CL051	E14.5	NAcc	174	71	0.408
CL052	E14.5	NAcc	136	58	0.4265
CL053	E14.5	NAcc	159	61	0.3836
AI33	E14.5	NAcc	108	39	0.3611
CL057	E16.5	NAcc	80	2	0.025
CL058	E16.5	NAcc	54	2	0.037
AI35	E16.5	NAcc	103	35	0.3398
AI45	E16.5	NAcc	76	27	0.3553
AI35_b	E12.5	LHA	10	1	0.1
AI47	E12.5	LHA	16	6	0.375
CL072	E14.5	LHA	110	0	0
CL073	E14.5	LHA	340	8	0.0235
AI49	E14.5	LHA	68	16	0.2353
CL069	E16.5	LHA	41	0	0
AI48	E16.5	LHA	85	2	0.0235
