# Supplementary material for: CA1 pyramidal cell diversity is rooted in the time of neurogenesis
Source: eLife. 2021 Nov 1;10:e69270. doi: 10.7554/eLife.69270 (PMC8660020; doi:10.7554/eLife.69270)
Supplement: Figure 7—source data 1. [file elife-69270-fig7-data1.csv]

		Distance (�m) of primary bifurcation
	Location (0-1)	from Soma	from SR/SP border
E12.5	1.23	270.07	125.83
E12.5	0.84	196.61	120.17
E12.5	0.93	176.67	96.97
E12.5	1.16	352.17	224.83
E12.5	1.09	357.39	246.93
E12.5	0.57	366.49	327.79
E12.5	0.81	157.26	79.34
E12.5	1.49	379.73	252.57
E12.5	-0.15	91.85	71.06
E12.5	0.83	8.46	-80.49
E12.5	0.29	268.81	202.01
E12.5	1.48	257.91	111.32
E12.5	0.06	40.33	40.33
E12.5	0.15	100.34	83.62
E12.5	0.66	410.17	366.05
E12.5	1.51	354.23	174.54
E12.5	1.20	286.03	104.47
E12.5	0.77	296.49	194.25
E12.5	1.16	384.88	276.90
E12.5	1.38	526.86	369.08
E12.5	1.20	345.87	145.09
E12.5	0.32	161.47	131.67
E12.5	0.71	349.49	282.66
E12.5	0.62	335.73	294.63
E12.5	1.52	410.29	264.09
E12.5	1.58	221.78	86.27
E12.5	0.42	101.48	82.88
E12.5	0.78	307.87	255.42
E12.5	0.90	249.39	161.41
E12.5	0.91	394.66	321.15
E14.5	0.88	289.33	214.61
E14.5	0.78	369.12	283.44
E14.5	1.00	339.69	200.14
E14.5	0.57	192.49	152.68
E14.5	0.70	414.85	365.31
E14.5	0.66	408.65	343.90
E14.5	0.66	474.10	424.97
E14.5	0.81	201.79	153.47
E14.5	0.70	399.58	336.42
E14.5	0.80	392.08	340.59
E14.5	0.55	460.57	398.99
E14.5	0.79	164.49	75.66
E14.5	0.81	211.38	149.32
E14.5	0.79	406.40	360.09
E16.5	0.11	385.40	404.05
E16.5	0.13	131.01	131.01
E16.5	0.00	81.97	81.97
E16.5	0.13	46.11	39.68
E16.5	0.14	154.19	147.61
E16.5	0.12	55.12	55.12
E16.5	0.16	187.72	133.70
E16.5	0.04	90.95	100.95
E16.5	0.08	226.55	217.52
E16.5	0.12	57.44	49.56
E16.5	0.30	203.21	187.65
E16.5	0.12	278.89	271.33
E16.5	0.12	187.09	182.93
E16.5	-0.09	386.33	379.72
E16.5	0.23	31.76	13.57
E16.5	0.09	196.13	203.23
E16.5	1.06	68.13	-30.24
E16.5	0.80	228.07	145.30
E16.5	0.07	71.80	65.64
E16.5	-0.16	49.49	69.02
