# Supplementary material for: CA1 pyramidal cell diversity is rooted in the time of neurogenesis
Source: eLife. 2021 Nov 1;10:e69270. doi: 10.7554/eLife.69270 (PMC8660020; doi:10.7554/eLife.69270)
Supplement: Figure 8—source data 1. [file elife-69270-fig8-data1.csv]

					Distance moved (cm)				Mean velocity (cm/s)				Time spent moving (s)				Time IN-ZONE (%)				Time spent IN-ZONE (s)				Time spent IN/time spent moving				Cfos/DAPI	Cfos/Tdt
Animal	Mouse ID	Birthdate	Condition		Sess1	Sess2	Sess3		Sess1	Sess2	Sess3		Sess1	Sess2	Sess3		Sess1	Sess2	Sess3		Sess1	Sess2	Sess3		Sess1	Sess2	Sess3		fraction	fraction
E12_F1	441 017	E12	FAM		3538.41	3184.91	1961.66		2.94867	2.65409	1.63472		172.92	126.44	124.08		20.77264091	12.32292257	17.88273724		249.2716909	147.8750708	214.5928469		1.441543436	1.169527609	1.729471687		0.09	0.191
E12_F2	441 018	E12	FAM		5457.15	4011.42	3922.86		4.54762	3.34285	3.26905		115.64	103.96	66.08		8.019732676	13.12622913	19.62601247		96.23679211	157.5147495	235.5121496		0.83221024	1.515147648	3.564045847		0.1	0.102
E14_F1	441 011	E14	FAM		4805.27	4525.17	3770.52		3.97906	3.77097	3.14242		176.24	119.6	133.68		25.12916236	6.619779341	15.42281924		301.5499483	79.43735209	185.0738309		1.711018772	0.664191907	1.384454151		0.12	0.07
E14_F2	440 994	E14	FAM		3865.54	3142.51	4242.9		3.21925	2.61876	3.53575		153.92	140.32	119		27.35161632	45.53181561	58.22721515		328.2193959	546.3817873	698.7265818		2.13240252	3.893826876	5.871651948		0.09	0.036
E14_F3	441 000	E14	FAM		5571.52	3725.68	4147.03		4.64294	3.10474	3.45586		122.6	101.68	136.76		11.54896736	19.77600747	24.17919403		138.5876083	237.3120896	290.1503283		1.130404635	2.333911188	2.121602284		0.1	0.028
E16_F1	441 004	E16	FAM		6767.03	3946.14	2696.6		5.63919	3.28845	2.24717		210.04	124.2	84.16		5.096496783	4.529849005	1.343288557		61.1579614	54.35818806	16.11946268		0.291172926	0.437666571	0.19153354		0.08	0.038
E16_F2	441 006	E16	FAM		3345.77	2891.29	1864.66		2.78814	2.40941	1.55388		109.68	94.76	62.76		32.04226526	14.08619713	21.10596313		384.5071831	169.0343655	253.2715576		3.5057183	1.783815592	4.035557005		0.08	0.088
E16_F3	441 007	E16	FAM		4821.94	3860.88	5005.35		4.01828	3.2174	4.17112		153.88	123.2	157.92		15.34615513	5.723142562	14.34285524		184.1538615	68.67771074	172.1142629		1.196736818	0.557448951	1.089882617		0.09	0.044
E12_N1	441 014	E12	NOV				5217.95				4.34829				199.8				10.91963601				131.0356321				0.655833995		0.09	0.047
E12_N2	441 015	E12	NOV				6253.89				5.21158				197.96				14.07619746				168.9143695				0.853275255		0.11	0.055
E12_N3	441 016	E12	NOV				6312.92				5.26077				163.56				12.49958335				149.9950002				0.917064075		0.13	0.065
E14_N1	440 992	E14	NOV				4894.21				4.07851				152.28				17.82940569				213.9528682				1.404996508		0.16	0.102
E14_N2	440 999	E14	NOV				6696.01				5.58075				214.68				16.33278891				195.9934669				0.912956339		0.09	0.065
E14_N3	441 012	E14	NOV				5278.07				4.39839				167.64				11.63627879				139.6353455				0.832947659		0.03	0.103
E14_N4	441 013	E14	NOV				6434.35				5.36196				204.32				20.08933036				241.0719643				1.179874531		0.11	0.032
E16_N1	441 003	E16	NOV				5582.34				4.65195				175.56				12.54624846				150.5549815				0.857569956		0.13	0.054
E16_N2	441 008	E16	NOV				3972.7				3.31058				128.96				8.613046232				103.3565548				0.801462118		0.11	0
E16_N3	441 009	E16	NOV				5062.87				4.21905				162.12				16.53944869				198.4733842				1.224237504		0.13	0.021
Linear correlation with cFos expression (%)
		Time Spent Moving %	Time in Center Zone %	% Time in Center/total moving
Best-fit values	Slope	-0.311	0.8141	0.01592
	Y-intercept	15.17	9.135	1.484
	X-intercept	48.79	-11.22	-93.27
	1/slope	-3.216	1.228	62.83
	Std. Error of Slope	0.2957	1.032	0.1322
	Std. Error of Y-intercept	3.102	10.83	1.387
95% Confidence Intervals	Slope	-0.9379 to 0.3159	-1.375 to 3.003	-0.2643 to 0.2961
	Y-intercept	8.595 to 21.75	-13.83 to 32.10	-1.455 to 4.424
	X-intercept	22.78 to +infinity	-infinity to 4.808	-infinity to 5.221
Goodness of Fit	R squared	0.06464	0.03741	0.0009055
	Sy.x	3.313	11.57	1.48
Is slope significantly non-zero?	F	1.106	0.6218	0.0145
	DFn;DFd	1,16	1,16	1,16
	P value	0.3086	0.4419	0.9056
	Deviation from zero?	Not Significant	Not Significant	Not Significant
