# Supplementary figures and images for: CA1 pyramidal cell diversity is rooted in the time of neurogenesis
Source: eLife journal article supplement (doi:10.7554/elife.69270), 2021-11-01

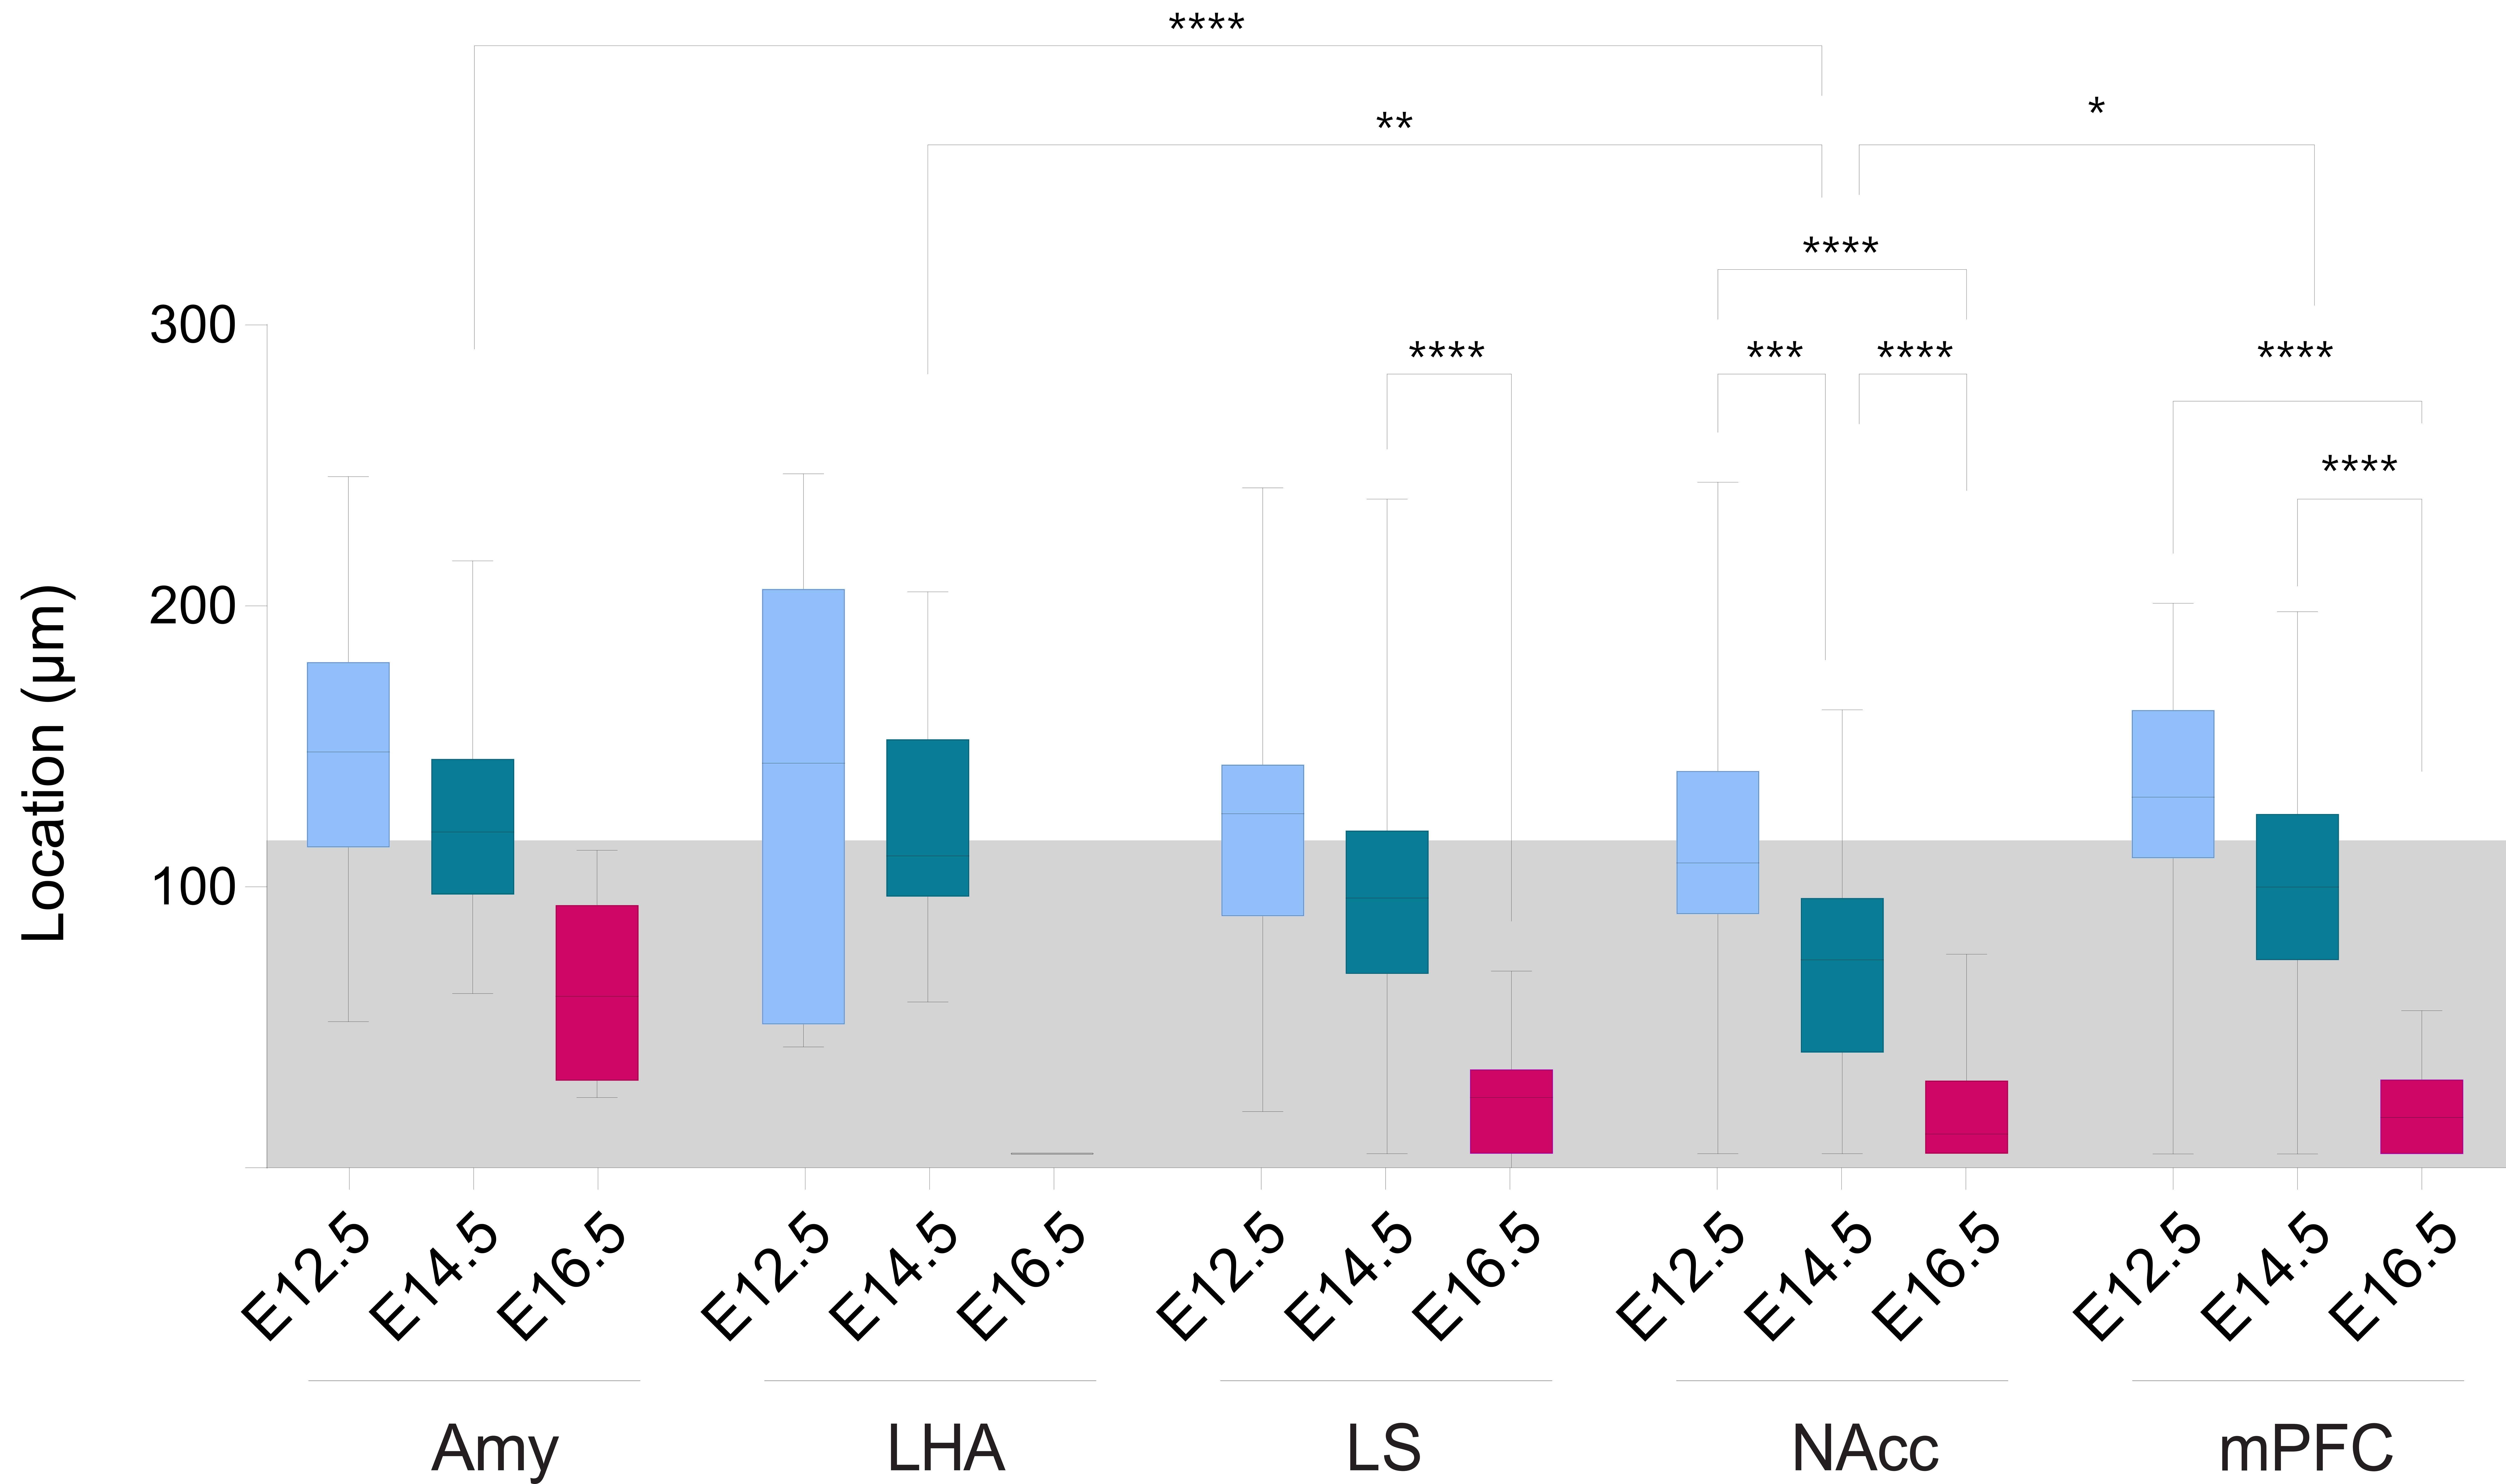

Supplement: supp [file elife-69270-supp-v1.zip]

Location ( $\mu\text{m}$ )

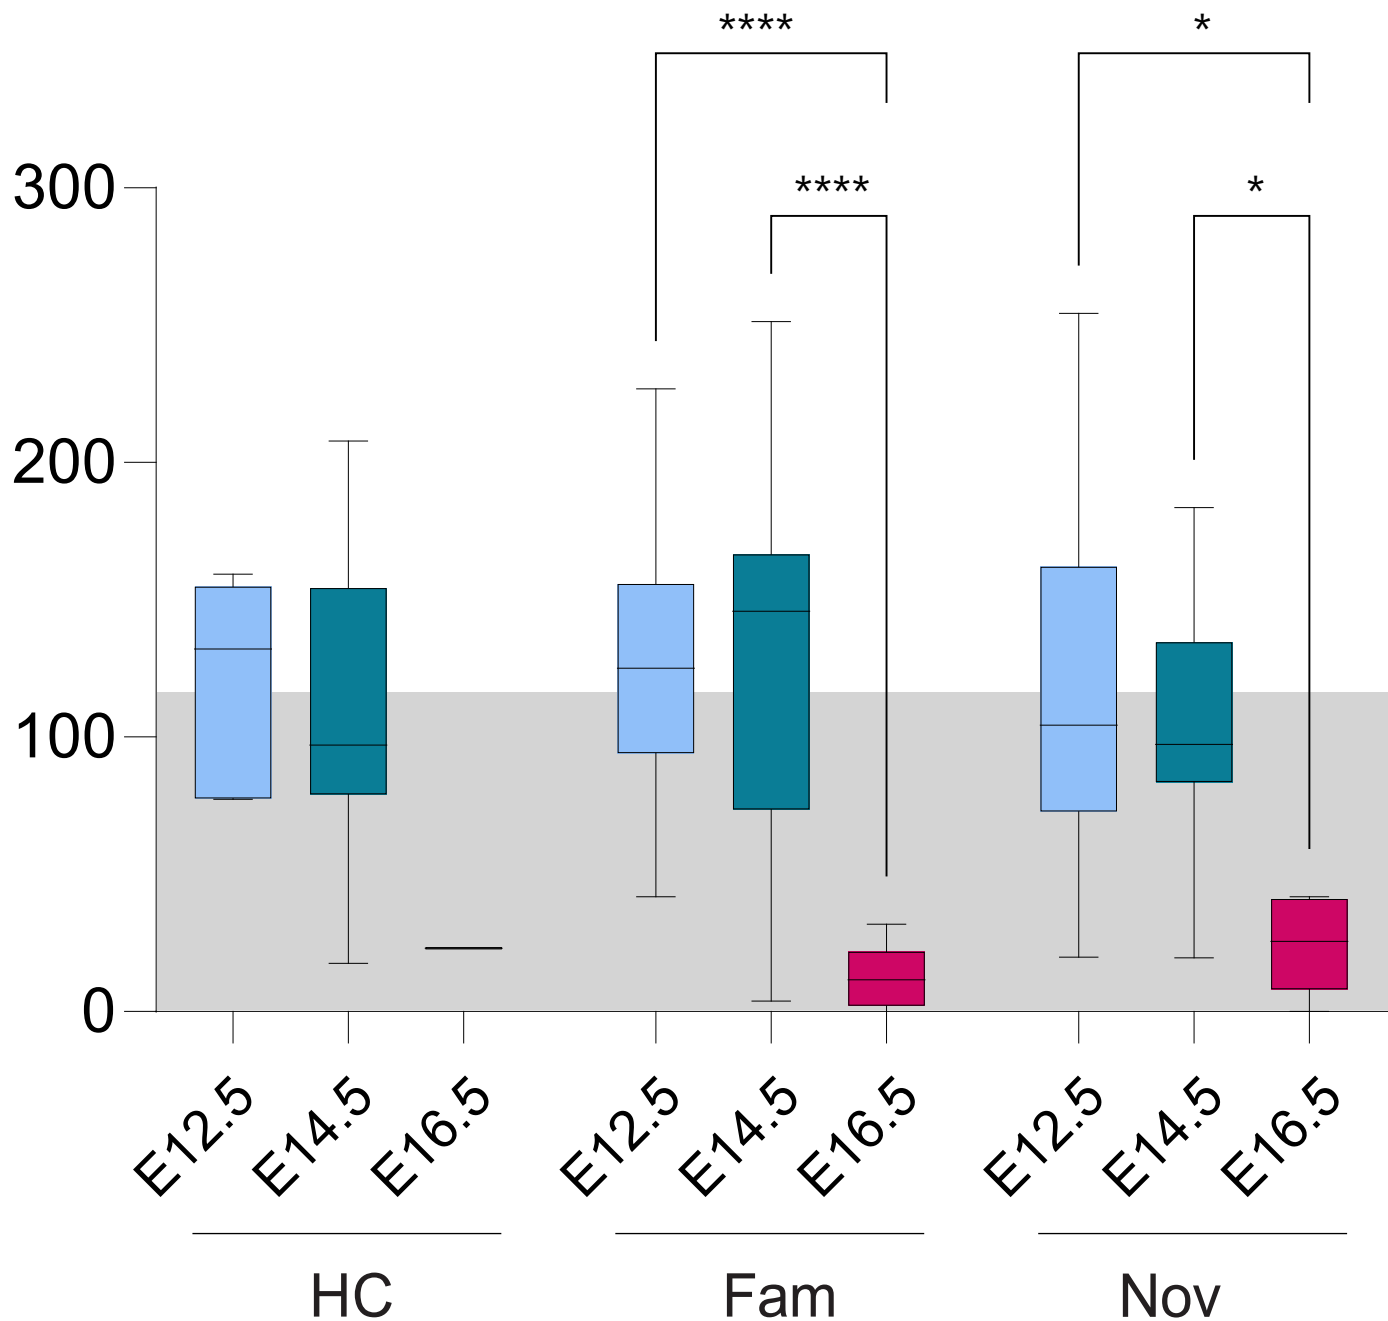

Supplement: supp [file elife-69270-supp-v1.zip]
